# Supplementary material for: Anion-dependent dynamic structure and tunable luminescence of Zn-MOFs with carboxyphenyl-terpyridine ligands
Source: Royal Society of Chemistry journal article supplement (doi:10.1039/d3ce00405h), 2023-01-01
Supplement: d3ce00405h1.pdf [file d3ce00405h1.pdf]

# Electronic Supporting Information

## **Anion-dependent dynamic structure and tunable luminescence of Zn-MOFs with carboxyphenyl-terpyridine ligands**

Runzhong Guo<sup>§</sup>, Yuchen Liu<sup>§</sup>, Zhibin Wang, Haiying Wang\* and Huiyan Liu\*

School of Chemistry & Materials Science, Jiangsu Key Laboratory of Green Synthetic  
Chemistry for Functional Materials, Jiangsu Normal University, Xuzhou 221116, P.  
R. China

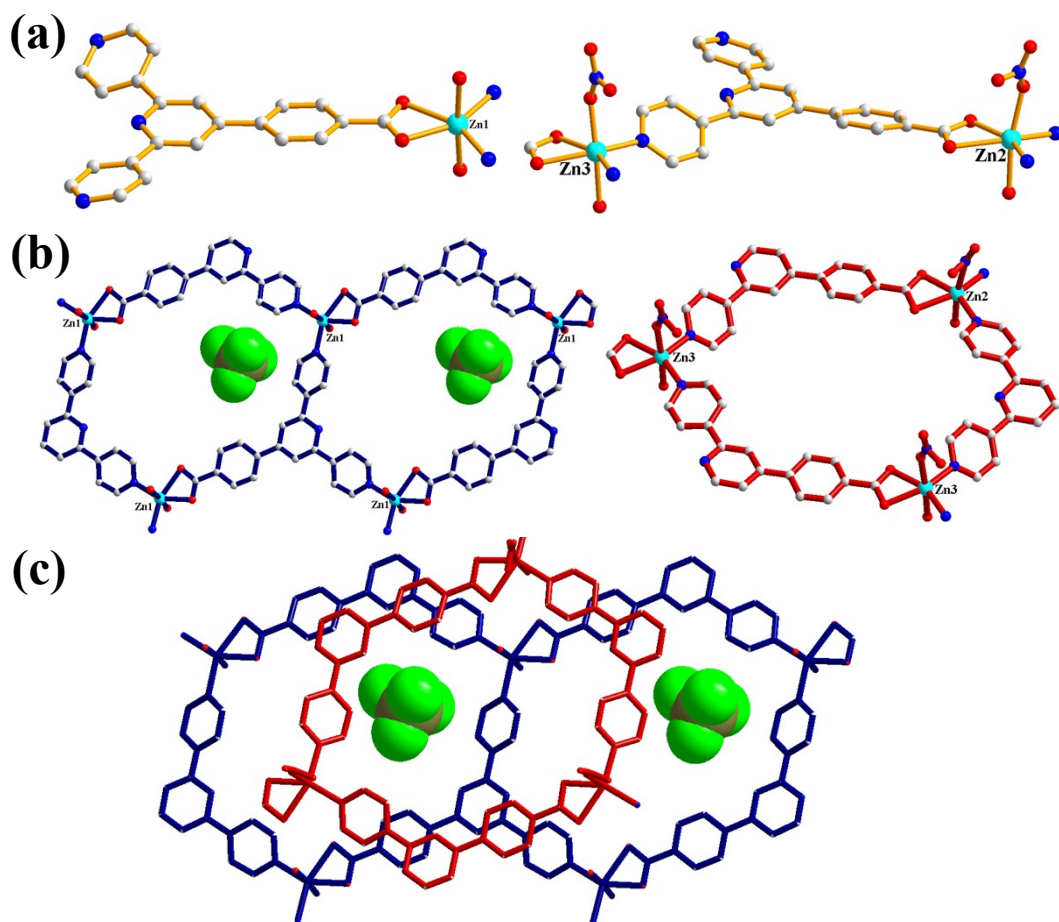

**Fig. S1** Crystal structure of  $1\supset\text{BF}_4^-$ . (a) Coordination environment of Zn(II) ions. (b) The two layers comprised of Zn1 centers (left) and Zn2/3 centers (right). (c) The packed double-layers viewed along the  $b$  axis with free  $\text{BF}_4^-$  anions shown in space-filling mode.

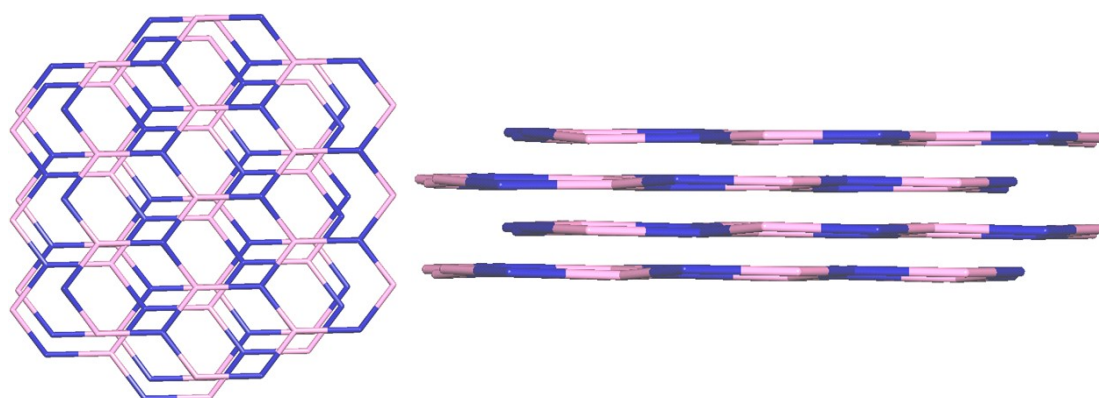

**Fig. S2** The 3-connected  $hcb$  topological representation of  $1$  ( $1\supset\text{ClO}_4^-$  and  $1\supset\text{BF}_4^-$ ) viewed along the  $b$  axis (left) and  $c$  axis (right).

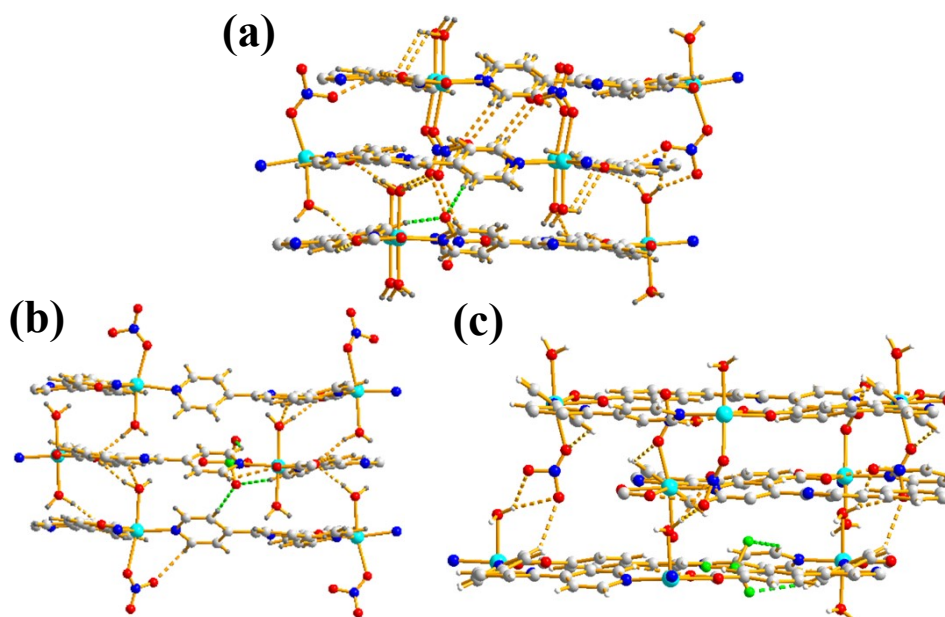

**Fig. S3** The hydrogen bonds between the coordination nitrate ions and the coordination water within the framework (orange dotted lines), and between C–H of HL linkers and lattice anions (green dotted lines) in  $1\text{DNO}_3^-$  (a),  $1\text{DClO}_4^-$  (b) and  $1\text{DBF}_4^-$  (c).

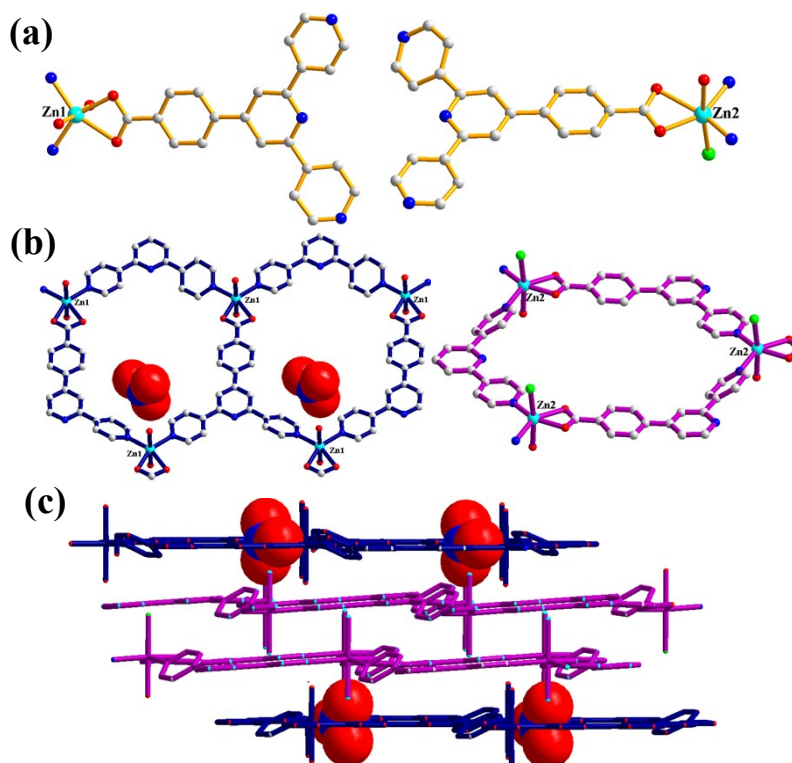

**Fig. S4** Crystal structure of **2**. (a) Coordination environment of Zn(II) ions. (b) The two layers comprised of Zn1 centers (left) and Zn2 centers (right). (c) The packed double-layers viewed along the  $c$  axis with uncoordinated  $\text{NO}_3^-$  anions (space-filling mode) located within the framework.

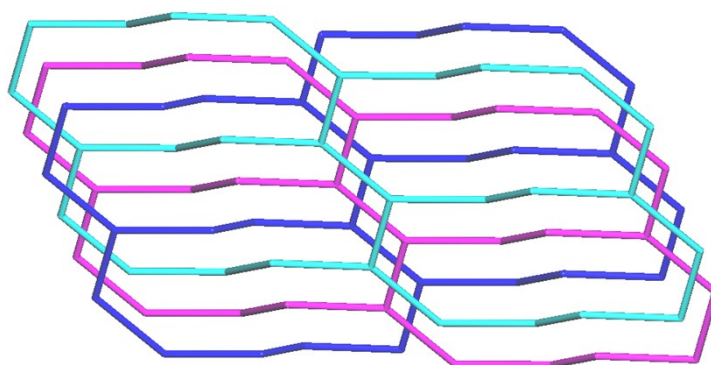

**Fig. S5** The 3-fold interpenetrating 3D framework of **3** with *ths* topology.

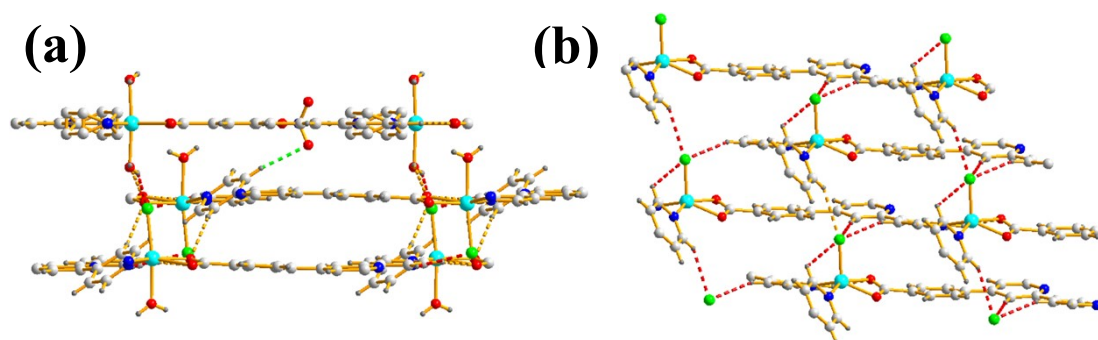

**Fig. S6** The hydrogen bonds between the coordination chloride ions and framework (red dotted lines), and between C–H of HL linker and lattice anions (green dotted line) in **2** (a) and **3** (b).

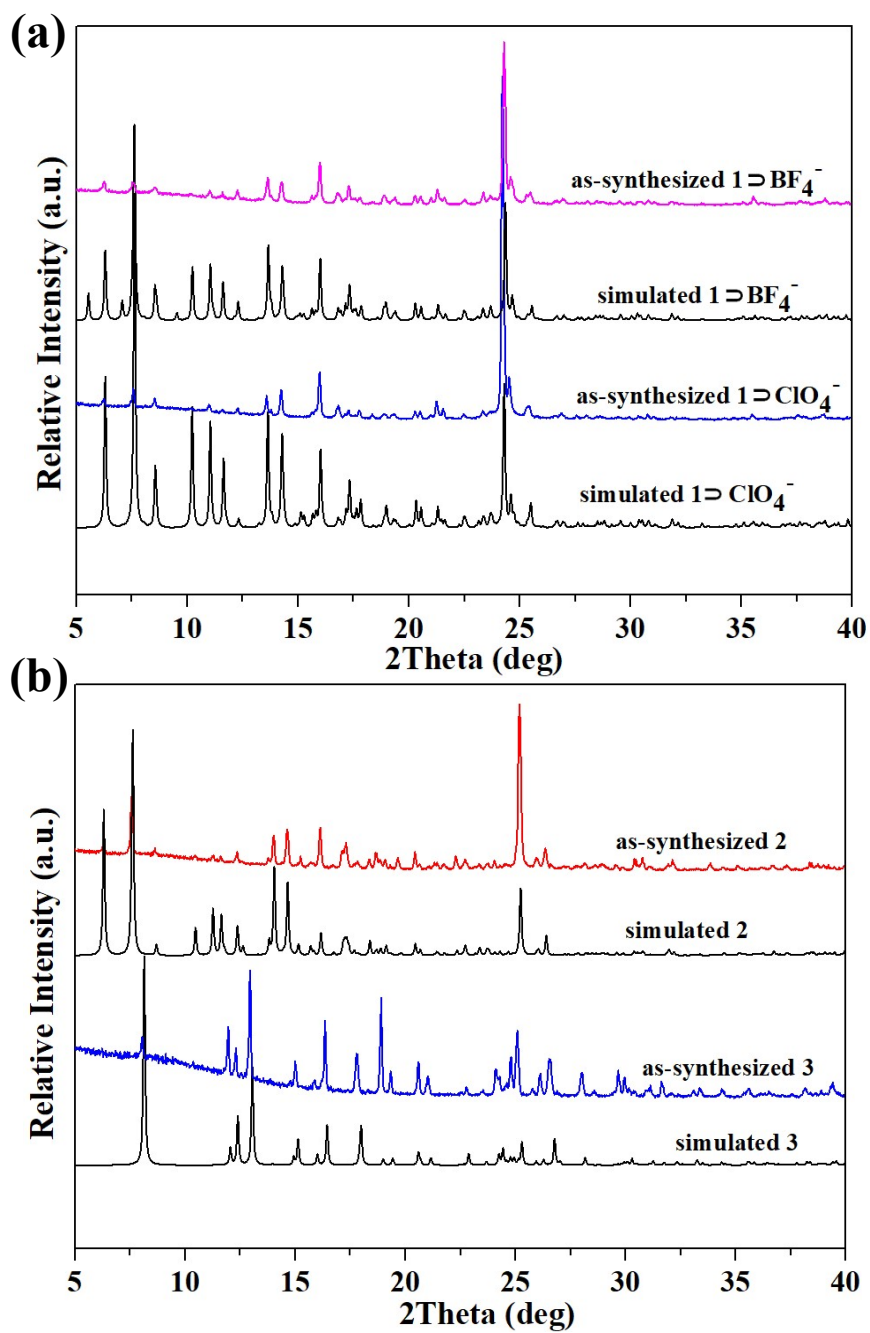

**Fig. S7** PXRD patterns for **1** ( $1 \supset \text{ClO}_4^-$  and  $1 \supset \text{BF}_4^-$ ) (a), **2** and **3** (b): a simulated PXRD pattern from the single-crystal structure and as-synthesized samples, respectively.

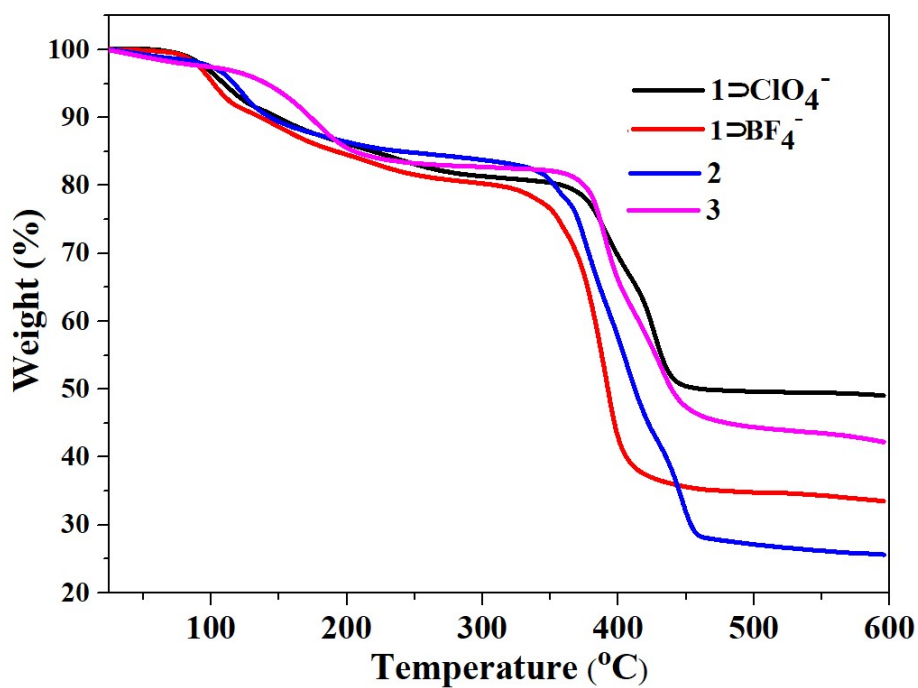

Fig. S8 TGA data of as-synthesized **1** ( $1\text{DClO}_4^-$  and  $1\text{DBF}_4^-$ ), **2** and **3**.

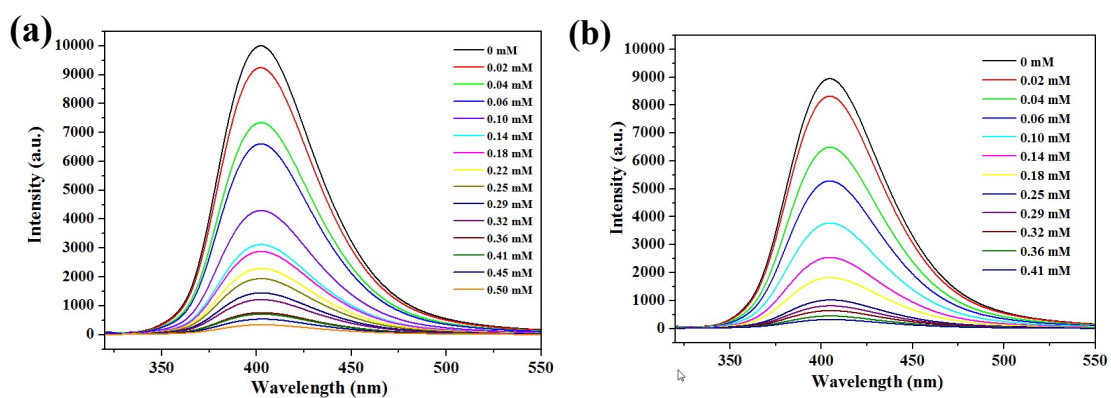

Fig. S9 The fluorescence emission spectra of  $1\text{DClO}_4^-$  (a) and  $1\text{DBF}_4^-$  (b) with 4-NT of different concentrations.



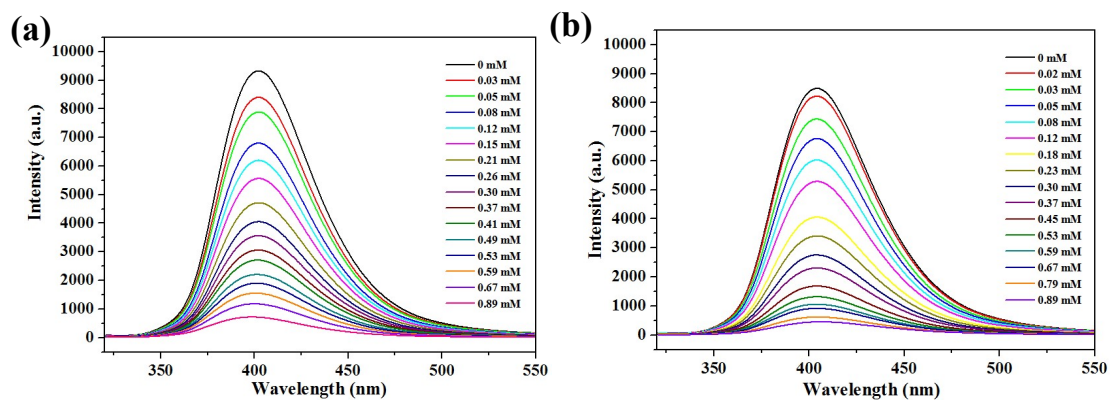

Fig. S10 The fluorescence emission spectra of  $1\text{DClO}_4$  (a) and  $1\text{D BF}_4^-$  (b) with 1,3-DNB of different concentrations.

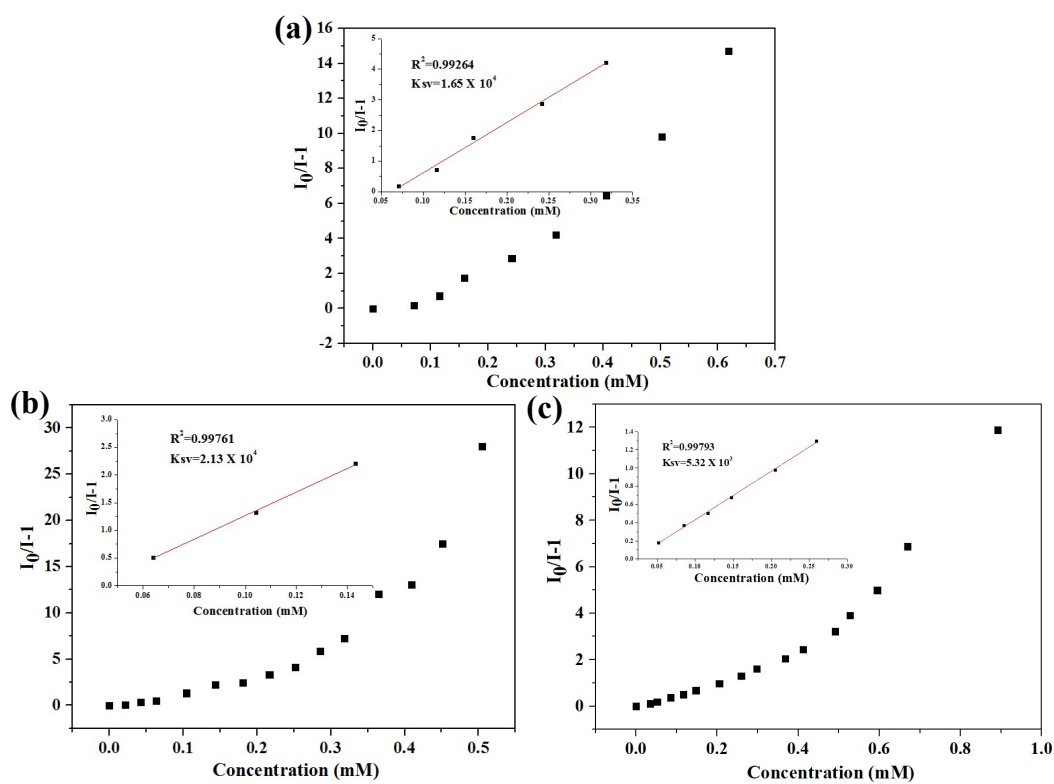

Fig. S11 The Stern-Volmer plots for  $1\text{DClO}_4^-$  with NB (a), 4-NT (b) and 1,3-DNB (c).

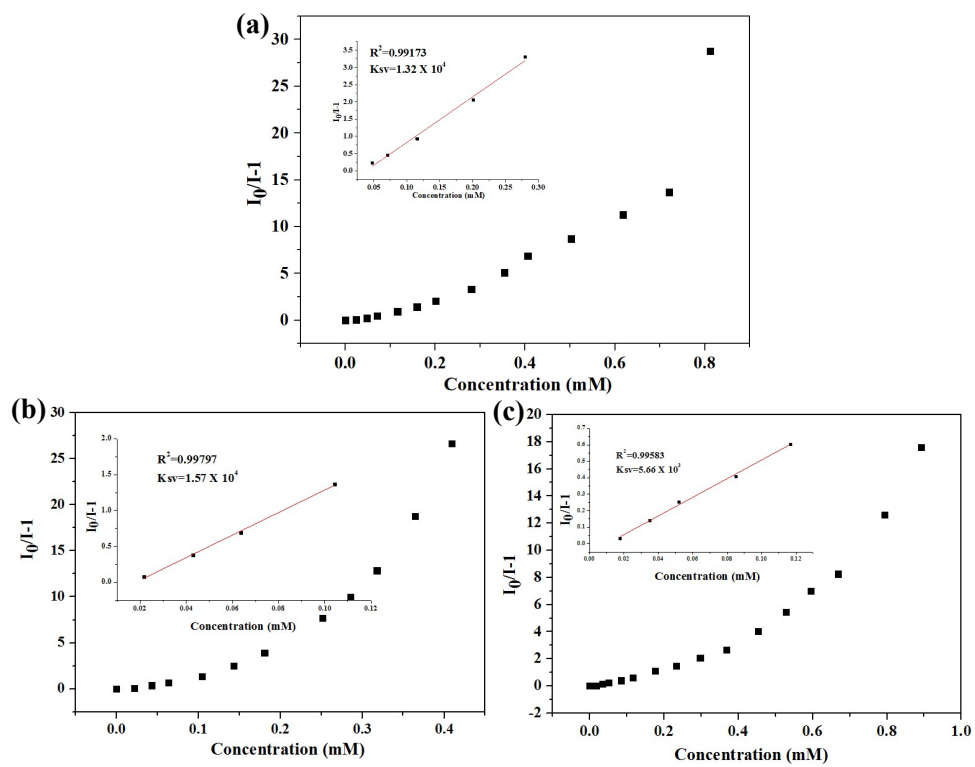

Fig. S12 The Stern-Volmer plots for 1-DBF<sub>4</sub><sup>-</sup> with NB (a), 4-NT (b) and 1,3-DNB (c).



**Table S1** Parameters of hydrogen bonding interactions involving in C-H of HL and anions in **1** (**1**NO<sub>3</sub><sup>-</sup>, **1**ClO<sub>4</sub><sup>-</sup> and **1**BF<sub>4</sub><sup>-</sup>)

| D-H...A                                | <i>d</i> (D-H) | <i>d</i> (H...A) | <i>d</i> (D...A) | ∠(DHA) |
|----------------------------------------|----------------|------------------|------------------|--------|
| <b>1</b> NO <sub>3</sub> <sup>-</sup>  |                |                  |                  |        |
| C17-H17...O18                          | 0.93           | 2.479            | 3.404            | 173.14 |
| C39-H39...O19#7                        | 0.93           | 2.590            | 3.510            | 170.42 |
| C64-H64...O18#8                        | 0.93           | 2.664            | 3.364            | 132.62 |
| <b>1</b> ClO <sub>4</sub> <sup>-</sup> |                |                  |                  |        |
| C21-H21...O20#7                        | 0.93           | 2.591            | 3.301            | 133.48 |
| C58-H58...O20#1                        | 0.93           | 2.601            | 3.529            | 175.94 |
| <b>1</b> BF <sub>4</sub> <sup>-</sup>  |                |                  |                  |        |
| C15-H15...F2                           | 0.93           | 2.522            | 3.243            | 134.55 |
| C21-H21...F1#11                        | 0.93           | 2.600            | 3.293            | 131.70 |

Symmetry codes: **1**NO<sub>3</sub><sup>-</sup>: #7: x-1, -y+3/2, z-1/2 ; #8: x, -y+3/2, z+1/2 ; **1**ClO<sub>4</sub><sup>-</sup>: #7: -x+1, -y+1, -z+1; #1: x+1/2, -y+1/2, z-1/2; **1**BF<sub>4</sub><sup>-</sup>: #11: x-1/2, -y+1/2, z-1/2.

**Table S2** Parameters of hydrogen bonding interactions involving in O-H/C-H and chloride ions in **2** and **3**

| D-H...A          | <i>d</i> (D-H) | <i>d</i> (H...A) | <i>d</i> (D...A) | ∠(DHA) |
|------------------|----------------|------------------|------------------|--------|
| <b>2</b>         |                |                  |                  |        |
| O2-H2B...Cl1#7   | 0.85           | 2.474            | 3.230            | 148.57 |
| C17-H17...Cl1#10 | 0.93           | 2.935            | 3.638            | 133.51 |
| <b>3</b>         |                |                  |                  |        |
| C22-H22...Cl2#6  | 0.93           | 2.733            | 3.5958           | 154.56 |
| C16-H16...Cl2#3  | 0.93           | 2.836            | 3.363            | 117.12 |
| C15-H15...Cl2#8  | 0.93           | 2.871            | 3.614            | 137.72 |
| O3-H3A...Cl2     | 0.85           | 2.476            | 3.245            | 150.83 |

Symmetry codes: **2**: #7: -x, -y+1, -z; #10: -x, -y+1, -z; **3**: #6: x, y+1, z; #3: x-1/2, -y+1/2, z+1/2; #8: x, -y, z+1/2.

**Table S3** Fluorescence test data related to three MOFs

| MOFs                                   | I <sub>0</sub> | K <sub>sv</sub> (M <sup>-1</sup> ) |                        |                        |
|----------------------------------------|----------------|------------------------------------|------------------------|------------------------|
|                                        |                | NB                                 | 4-NT                   | 1,3-DNB                |
| <b>1</b> NO <sub>3</sub> <sup>-</sup>  | 6500           | 1.33 × 10 <sup>4</sup>             | 1.48 × 10 <sup>4</sup> | 2.53 × 10 <sup>3</sup> |
| <b>1</b> ClO <sub>4</sub> <sup>-</sup> | 9400           | 1.65 × 10 <sup>4</sup>             | 2.13 × 10 <sup>4</sup> | 5.32 × 10 <sup>3</sup> |
| <b>1</b> BF <sub>4</sub> <sup>-</sup>  | 8600           | 1.32 × 10 <sup>4</sup>             | 1.57 × 10 <sup>4</sup> | 5.66 × 10 <sup>3</sup> |
